# Supplementary material for: Oxidative Stress and Multi-Organel Damage Induced by Two Novel Phytocannabinoids, CBDB and CBDP, in Breast Cancer Cells
Source: MDPI journal article supplement (doi:10.3390/molecules26185576), 2021-09-14
Supplement: s1 [file s1]

Supplementary Materials:

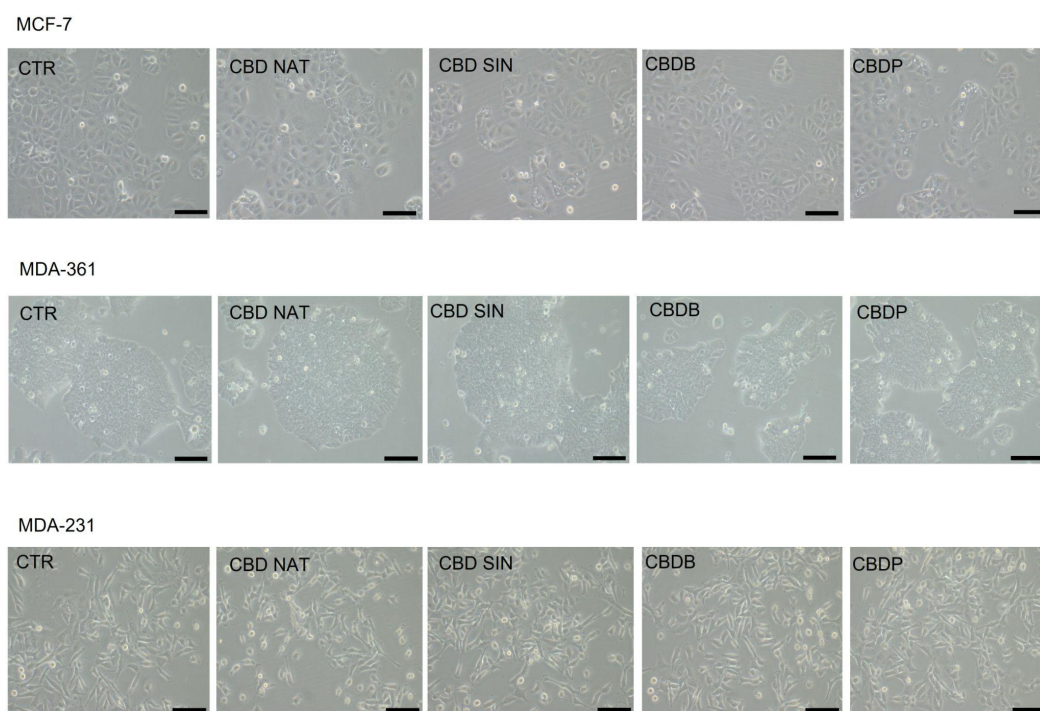

**S1:** Representative images of MCF-7, MDA-MB-361 and MDA-MB-231 cells treated with vehicle (DMSO) or cannabinoid homologs at the concentration of 10  $\mu$ M for 24 h. Images were acquired using an inverted wide-field microscope (Olympus IX51), objective 10x. Scale bar corresponds to 100  $\mu$ m.

A

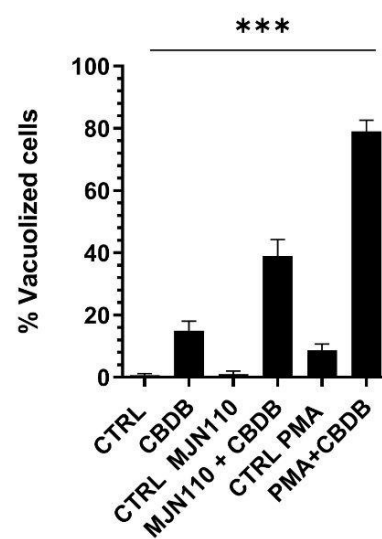

B

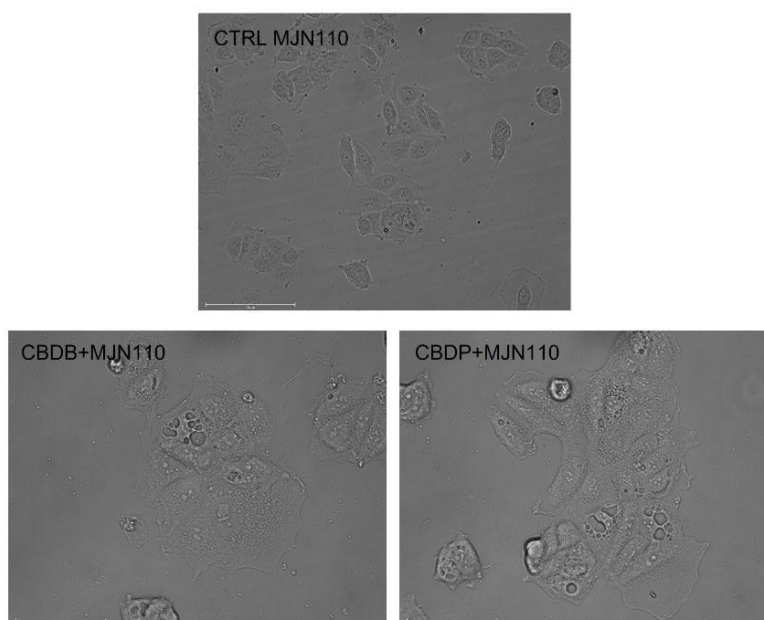

C

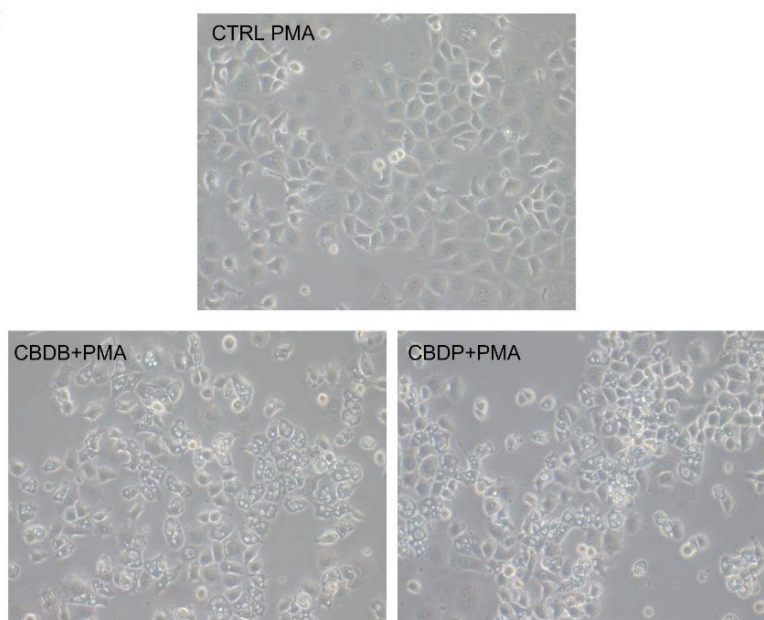

**S2:** (A) Quantification of vacuolated cells and average vacuole sizes in the presence or absence of the indicated treatments. Values are the mean  $\pm$  SD. p-value \*\*\*\*  $< 0.0001$ , \*\*P  $< 0.01$ ; \*\*\*\*P  $< 0.0001$  compared with control; (B) Representative images of MCF-7 cells treated with vehicle (DMSO+MJN110), CBDB or CBDP (10  $\mu$ M) in combination with MJN110 (1  $\mu$ M) for 24 h. Images were acquired using an Evos m7000 fluorescence microscope. Scale bar 150  $\mu$ m; , objective 20x (C) Representative images of MCF-7 cells treated with vehicle (DMSO+PMA), CBDB or CBDP (10  $\mu$ M) in combination with PMA (1  $\mu$ M) for 24 h. Images were acquired using an inverted wide-field microscope (Olympus IX51). Scale bar 100  $\mu$ m, , objective 10x.

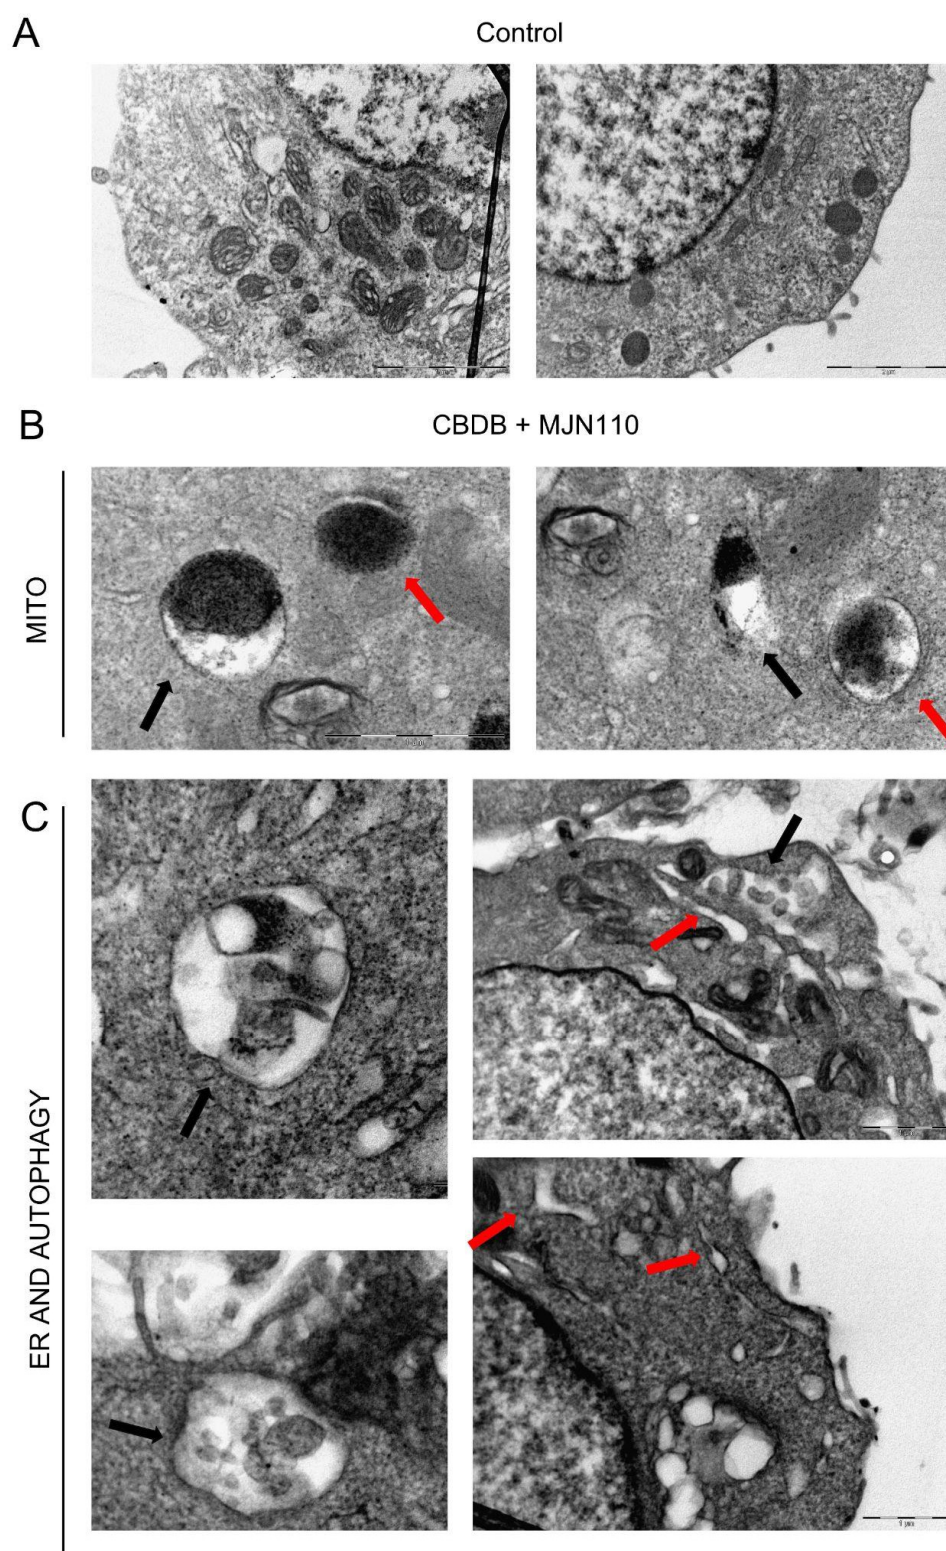

---

**S3:** Representative TEM images of cell morphology. (A) MCF-7 cells are treated with vehicle (DMSO+MJN110) as controls showing normal cell organelles. Scale bar 2  $\mu\text{m}$ . (B) MCF-7 cells fixed after incubation with CBDB + MJN110 (1  $\mu\text{M}$ ), mitochondria with dilated cristae (black arrow) and swollen mitochondria with decreased electron matrix density (red arrow); (C) autophagic vacuoles containing different organelles or electron-dense material (black arrows); outstretched ER (red arrows). Scale bar 1  $\mu\text{m}$ .



A

CTRL

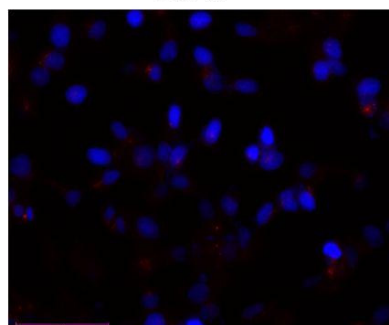

CBDB +MJN110

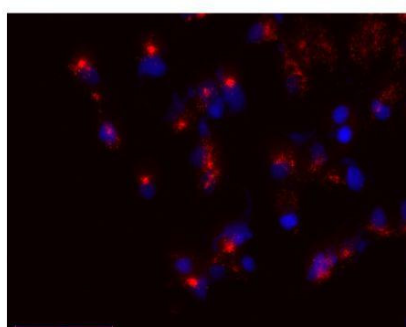

CBDP +MJN110

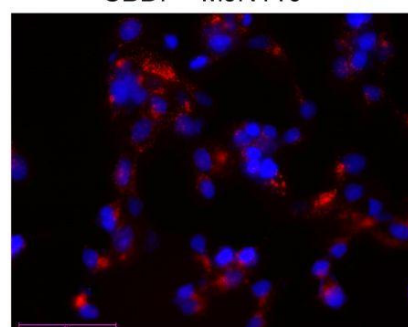

B

CTRL

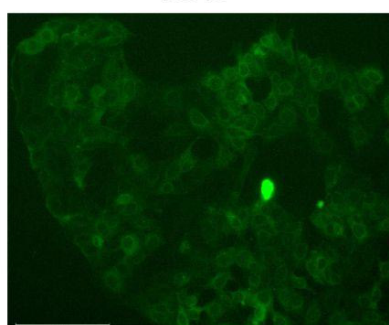

CBDB +MJN110

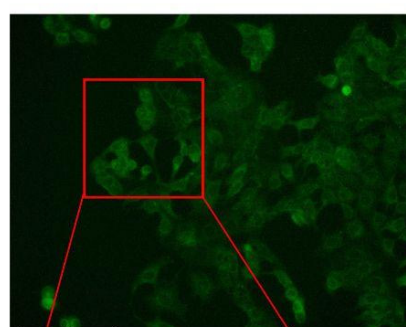

CBDP +MJN110

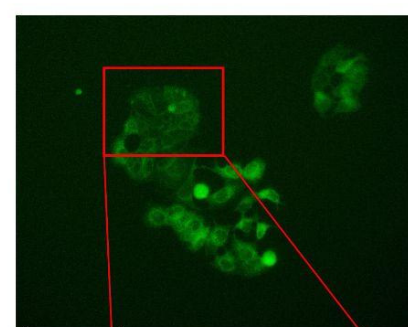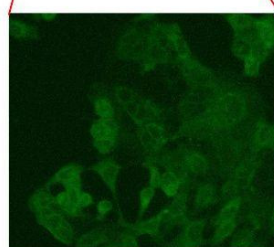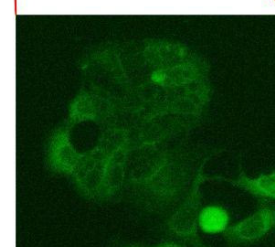

**S4:** Representative fluorescent images of organelles structures. MCF-7 cells are treated with vehicle (DMSO+MJN110) and MJN110+CBDB and CBDP for 24 h. (A) Cells were stained with the Hoechst (0,5 mg/mL) and Lysotracker Red DND-99 (100 nM); (B) Cells were stained with ER Tracker™ to visualize the endoplasmic reticulum membrane according to manufacturer's recommendations and imaged with an Evos m7000 fluorescence microscope. Scale bar 150  $\mu$ m, ), objective 20x.

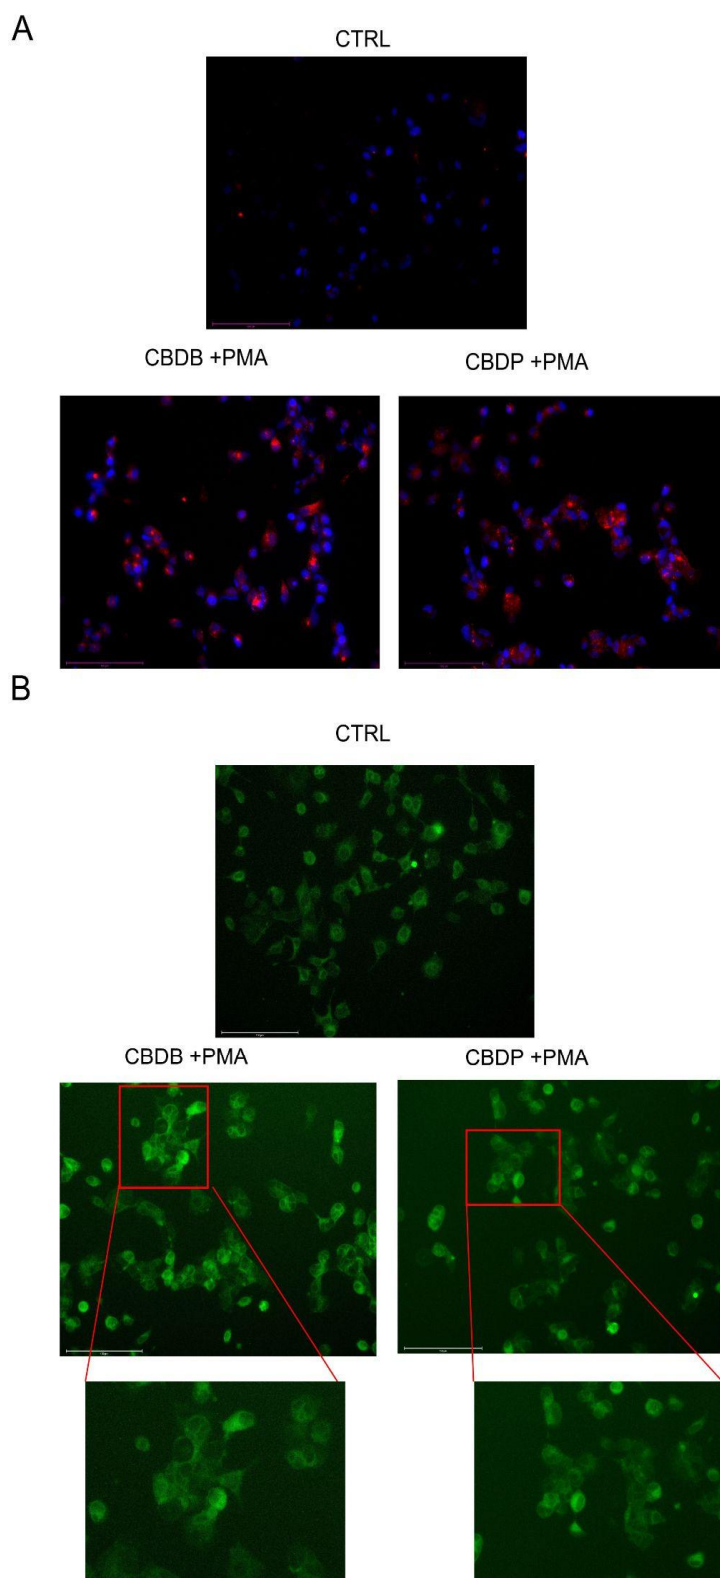

---

**S5.** Representative fluorescent images of organelles structures. MCF-7 cells are treated with vehicle (DMSO+PMA) and PMA + CBDB and CBDP for 24 h. (A) Cells were stained with the Hoechst (0,5 mg/mL) and LysoTracker Red DND-99 (100 nM); (B) Cells were stained with ER Tracker™ to visualize the endoplasmic reticulum membrane according to manufacturer's recommendations and imaged with an Evos m7000 fluorescence microscope. Scale bar 150  $\mu$ m, ), objective 20x.
